# Supplementary material
Source: PubMed Central journal article supplement (PMC129337)
Supplement: pnas_182267799_2.pdf [file pnas_182267799_2.pdf]

|             | 10                                 | 20                          | 30                                 | 40      | 50     | 60      | 70     | 80     | 90     | 100    |        |        |        |        |        |       |
|-------------|------------------------------------|-----------------------------|------------------------------------|---------|--------|---------|--------|--------|--------|--------|--------|--------|--------|--------|--------|-------|
| CO-2        | CCGAGCAATATTAGTTATTGGTGGGGATTCCGGT | TCGTTAGCTGGGATTTGTTTAGTCATT | CAGATAGTGACTGGCGTTTTTTTAGCTATGCATT | TATACAC |        |         |        |        |        |        | [100]  |        |        |        |        |       |
| AK-1        | .....                              | .....                       | .....                              | .....   | .....  | .....   | .....  | .....  | .....  | .....  | [100]  |        |        |        |        |       |
| EU-2        | .....                              | .....                       | .....                              | .....   | .....  | .....   | .....  | .....  | .....  | .....  | [100]  |        |        |        |        |       |
| CO-1        | .....                              | .....                       | .....                              | .....   | .....  | .....   | .....  | .....  | .....  | .....  | [100]  |        |        |        |        |       |
| AK-3        | .....                              | .....                       | .....                              | .....   | .....  | .....   | .....  | .....  | .....  | .....  | [100]  |        |        |        |        |       |
| AK-4        | .....                              | C.....                      | .....                              | .....   | .....  | .....   | .....  | .....  | .....  | .....  | [100]  |        |        |        |        |       |
| AK-2        | .....                              | C.....                      | .....                              | .....   | .....  | .....   | .....  | .....  | .....  | .....  | [100]  |        |        |        |        |       |
| EU-3        | .....                              | C.....                      | .....                              | .....   | .....  | .....   | .....  | .....  | .....  | .....  | [100]  |        |        |        |        |       |
| EU-1        | .....                              | C.....                      | .....                              | .....   | .....  | .....   | .....  | .....  | .....  | .....  | [100]  |        |        |        |        |       |
| S.latifolia | .....                              | .....                       | .....                              | .....   | .....  | .....   | .....  | .....  | .....  | .....  | [100]  |        |        |        |        |       |
| Stellaria   | .....                              | .....                       | .....                              | .....   | .....  | .....   | .....  | .....  | .....  | .....  | [100]  |        |        |        |        |       |
| Dianthus    | .....                              | .....                       | .....                              | .....   | .....  | .....   | .....  | .....  | .....  | .....  | [100]  |        |        |        |        |       |
| Beta        | .....                              | .....                       | .....                              | .....   | .....  | .....   | .....  | .....  | .....  | .....  | [100]  |        |        |        |        |       |
| Arabidopsis | .....                              | C.....                      | G.....                             | T.....  | .....  | .....   | .....  | .....  | C..... | .....  | [100]  |        |        |        |        |       |
| Oenothera   | .....                              | C.....                      | G.....                             | T.....  | .....  | A.....  | T..... | .....  | C..... | .....  | [100]  |        |        |        |        |       |
| Pisum       | .....                              | C.....                      | C.....                             | T.....  | A..... | .....   | .....  | .....  | C..... | .....  | [100]  |        |        |        |        |       |
| Helianthus  | .....                              | C.....                      | G.....                             | C.....  | T..... | .....   | .....  | .....  | C..... | .....  | [100]  |        |        |        |        |       |
| Nicotiana   | .....                              | C.....                      | G.....                             | T.....  | .....  | .....   | .....  | .....  | C..... | .....  | [100]  |        |        |        |        |       |
| Solanum     | .....                              | C.....                      | G.....                             | G.....  | T..... | .....   | .....  | .....  | C..... | .....  | [100]  |        |        |        |        |       |
| Triticum    | .....                              | C.....                      | G.....                             | A.....  | T..... | .....   | .....  | .....  | C..... | C..... | [100]  |        |        |        |        |       |
| Oryza       | .....                              | C.....                      | G.....                             | A.....  | T..... | .....   | .....  | .....  | C..... | C..... | [100]  |        |        |        |        |       |
| Zea         | .....                              | C.....                      | G.....                             | GC..... | T..... | .....   | .....  | .....  | C..... | .....  | [100]  |        |        |        |        |       |
| Marchantia  | .....                              | A.....                      | T.....                             | T.....  | G..... | TC..... | G..... | T..... | C..... | A..... | C..... | T..... | A..... | T..... | C..... | [100] |

|             | 110                                                                                                  | 120    | 130      | 140    | 150     | 160    | 170    | 180   | 190    | 200    |       |
|-------------|------------------------------------------------------------------------------------------------------|--------|----------|--------|---------|--------|--------|-------|--------|--------|-------|
| CO-2        | CTCATGTGGATCTAGCTTTCAACAGCGTAGAACACATTATGAGAGATGTTGAAGGGGGCTGGTTGCTCCGTTATATGCATGCTAATGGGGCAAGTATGTT |        |          |        |         |        |        |       |        |        | [200] |
| AK-1        | .....                                                                                                | .....  | .....    | .....  | .....   | .....  | .....  | ..... | .....  | .....  | [200] |
| EU-2        | .....                                                                                                | .....  | .....    | .....  | .....   | .....  | .....  | ..... | .....  | .....  | [200] |
| CO-1        | .....                                                                                                | .....  | .....    | .....  | .....   | .....  | .....  | ..... | .....  | .....  | [200] |
| AK-3        | .....                                                                                                | .....  | .....    | .....  | .....   | .....  | .....  | ..... | .....  | .....  | [200] |
| AK-4        | .....                                                                                                | C..... | .....    | .....  | .....   | .....  | .....  | ..... | .....  | .....  | [200] |
| AK-2        | .....                                                                                                | .....  | .....    | .....  | .....   | .....  | .....  | ..... | .....  | .....  | [200] |
| EU-3        | .....                                                                                                | .....  | .....    | .....  | .....   | .....  | .....  | ..... | .....  | .....  | [200] |
| EU-1        | .....                                                                                                | .....  | .....    | .....  | .....   | .....  | .....  | ..... | .....  | .....  | [200] |
| S.latifolia | .....                                                                                                | .....  | .....    | .....  | .....   | .....  | .....  | ..... | .....  | .....  | [200] |
| Stellaria   | .....                                                                                                | .....  | .....    | .....  | .....   | .....  | .....  | ..... | .....  | .....  | [200] |
| Dianthus    | .....                                                                                                | .....  | .....    | .....  | .....   | .....  | .....  | ..... | .....  | .....  | [200] |
| Beta        | .....                                                                                                | .....  | .....    | .....  | .....   | .....  | .....  | ..... | .....  | .....  | [200] |
| Arabidopsis | .....                                                                                                | T..... | .....    | .....  | .....   | .....  | .....  | ..... | .....  | .....  | [200] |
| Oenothera   | .....                                                                                                | .....  | .....    | .....  | .....   | .....  | .....  | ..... | .....  | .....  | [200] |
| Pisum       | .....                                                                                                | .....  | G.....   | .....  | .....   | .....  | .....  | ..... | .....  | .....  | [200] |
| Helianthus  | .....                                                                                                | .....  | .....    | .....  | .....   | .....  | .....  | ..... | .....  | .....  | [200] |
| Nicotiana   | .....                                                                                                | .....  | .....    | .....  | .....   | .....  | .....  | ..... | .....  | .....  | [200] |
| Solanum     | .....                                                                                                | .....  | .....    | .....  | .....   | .....  | .....  | ..... | .....  | .....  | [200] |
| Triticum    | .....                                                                                                | .....  | .....    | .....  | .....   | .....  | .....  | ..... | .....  | .....  | [200] |
| Oryza       | .....                                                                                                | .....  | .....    | .....  | .....   | .....  | .....  | ..... | .....  | .....  | [200] |
| Zea         | .....                                                                                                | .....  | .....    | .....  | .....   | .....  | .....  | ..... | .....  | .....  | [200] |
| Marchantia  | .....                                                                                                | T..... | TTA..... | C..... | GA..... | A..... | T..... | ..... | A..... | C..... | [200] |



|             | 410                                                                                                  | 420      | 430    | 440 | 450    | 460    | 470 | 480    | 490      | 500    |        |       |
|-------------|------------------------------------------------------------------------------------------------------|----------|--------|-----|--------|--------|-----|--------|----------|--------|--------|-------|
| CO-2        | TAGTAGGAGATAGCATAGTGACTTGGCTTTGGGGTGGTTTCTCCGTGGACAATGCCACCTTAAATCGTTTTTTTAGTCTTCATCATTCTACCCCTTTTCT |          |        |     |        |        |     |        |          |        | [500]  |       |
| AK-1        | .....                                                                                                |          |        |     |        |        |     |        |          |        | [500]  |       |
| EU-2        | .....                                                                                                |          |        |     |        |        |     |        |          |        | [500]  |       |
| CO-1        | .....                                                                                                |          |        |     |        |        |     |        |          |        | [500]  |       |
| AK-3        | .....                                                                                                |          |        |     |        |        |     |        |          |        | [500]  |       |
| AK-4        | .....                                                                                                |          |        |     |        |        |     |        |          |        | [500]  |       |
| AK-2        | .....                                                                                                |          |        |     |        |        |     |        |          |        | [500]  |       |
| EU-3        | .....                                                                                                |          |        |     |        |        |     |        |          |        | [500]  |       |
| EU-1        | .....                                                                                                |          |        |     |        |        |     |        |          |        | [500]  |       |
| S.latifolia | .....                                                                                                |          |        |     |        |        |     |        |          |        | [500]  |       |
| Stellaria   | .....                                                                                                |          |        |     |        |        |     |        |          | G.     | [500]  |       |
| Dianthus    | .....                                                                                                |          |        |     |        |        | C.  |        | T.       |        | G.     | [500] |
| Beta        | .....                                                                                                |          |        | C.  |        |        |     |        |          |        | A.     | [500] |
| Arabidopsis | .....                                                                                                | C.       |        |     |        |        |     |        |          | C.     | A.     | [500] |
| Oenothera   | .....                                                                                                | C.       |        |     |        |        |     |        |          | C.     | A.     | [500] |
| Pisum       | .....                                                                                                | C.       | T.     |     |        |        |     |        |          | C.     | A.     | [500] |
| Helianthus  | .....                                                                                                | C.       |        |     |        |        |     | C.     |          | C.     | A.     | [500] |
| Nicotiana   | .....                                                                                                | C.       |        |     | G.     |        |     |        |          | C.     | A.     | [500] |
| Solanum     | .....                                                                                                | C.       |        |     | G.     |        |     |        |          | C.     | A.     | [500] |
| Triticum    | .....                                                                                                | C.       |        |     |        |        |     | C.     |          | CC.    | A.     | [500] |
| Oryza       | .....                                                                                                | C.       |        |     |        |        |     | C.     |          | CC.    | A.     | [500] |
| Zea         | .....                                                                                                | C.       |        |     |        |        |     | C.     |          | CC.    | A.     | [500] |
| Marchantia  | .C.....                                                                                              | C.CT.... | A..... |     | C..... | A..... |     | C..... | T.C..... | T..... | A..... | [500] |

|             | 510                                                                                                 | 520    | 530    | 540    | 550       | 560         | 570          | 580 | 590       | 600    |       |
|-------------|-----------------------------------------------------------------------------------------------------|--------|--------|--------|-----------|-------------|--------------|-----|-----------|--------|-------|
| CO-2        | TTTAGTAGGGCGCCAGTCTTCTTCATCTGGCCGCATTGCATCAATATGGATCAAATAATCCATTAGGTGTACATTAGAGATGGATAAAATTTCTTTTAC |        |        |        |           |             |              |     |           |        | [600] |
| AK-1        | .....                                                                                               | A..... |        |        |           |             |              |     |           |        | [600] |
| EU-2        | .....                                                                                               |        |        |        |           |             |              |     |           |        | [600] |
| CO-1        | .....                                                                                               |        |        |        |           |             |              |     | GG.....   |        | [600] |
| AK-3        | .....                                                                                               | A..... |        |        |           |             |              |     |           |        | [600] |
| AK-4        | .....                                                                                               |        |        |        |           |             |              |     |           |        | [600] |
| AK-2        | .....                                                                                               | A..... |        |        |           |             |              |     |           | A..... | [600] |
| EU-3        | .....                                                                                               | A..... |        |        |           |             |              |     |           | T..... | [600] |
| EU-1        | .....                                                                                               |        |        |        |           |             |              |     |           |        | [600] |
| S.latifolia | .....                                                                                               |        |        |        |           |             |              |     |           |        | [600] |
| Stellaria   | .....                                                                                               |        |        |        |           |             |              |     | G.....    |        | [600] |
| Dianthus    | .....                                                                                               |        |        |        |           |             |              |     | C.....    |        | [600] |
| Beta        | .....                                                                                               |        |        |        |           |             |              |     | G.CC..... |        | [600] |
| Arabidopsis | .....                                                                                               |        |        |        |           | G.....      | T.....       |     | AG.....   |        | [600] |
| Oenothera   | .C.....                                                                                             |        |        |        | TTC.....  | G.....      |              |     |           |        | [600] |
| Pisum       | .....                                                                                               |        |        |        |           | G.....      |              |     | C.....    |        | [600] |
| Helianthus  | .....                                                                                               |        |        |        |           | G.G.....    |              |     | G.C.....  |        | [600] |
| Nicotiana   | .....                                                                                               |        |        |        | C.....    | G.....      |              |     | G.C.....  |        | [600] |
| Solanum     | .....                                                                                               |        |        |        | C.....    | G.....      |              |     | G.C.....  |        | [600] |
| Triticum    | .....                                                                                               |        |        |        |           | G.....      | T.....       |     | G.C.....  |        | [600] |
| Oryza       | .....                                                                                               |        | T..... |        |           | G.....      | T.....       |     | AG.C..... |        | [600] |
| Zea         | .....                                                                                               | C..... |        | T..... |           | G.....      | T.....       |     | G.C.....  |        | [600] |
| Marchantia  | AA...C...T..T..A.....                                                                               |        | T..... | A..... | T..C..... | G...A.CA... | TTCTG.A..... |     | AG.....   | T..... | [600] |



|             | 810                     | 820                                 | 830                            | 840            | 850    | 860                | 870    | 880    | 890       | 900    |       |
|-------------|-------------------------|-------------------------------------|--------------------------------|----------------|--------|--------------------|--------|--------|-----------|--------|-------|
| CO-2        | GGGAGGTGTAGCCGCAATAGCAC | CGTTTTTATATGTCTCTTGGCTTTACCTTTTTTAA | AAAAGTATGTATGTACGTAGTTCAGTTTTG | CCCGATT        | TAC    |                    |        |        |           |        | [900] |
| AK-1        | .....                   | .....                               | .....                          | .....          | .....  | .....              | .....  | .....  | .....     | .....  | [900] |
| EU-2        | .....                   | .....                               | .....                          | .....          | .....  | .....              | .....  | .....  | T.....    | .....  | [900] |
| CO-1        | .....                   | .....                               | .....                          | .....          | .....  | .....              | .....  | .....  | .....     | .....  | [900] |
| AK-3        | .....                   | .....                               | .....                          | .....          | .....  | T.....             | .....  | .....  | .....     | .....  | [900] |
| AK-4        | .....                   | .....                               | .....                          | .....          | .....  | T.....             | .....  | .....  | .....     | .....  | [900] |
| AK-2        | .....                   | .....                               | .....                          | .....          | .....  | .....              | .....  | .....  | .....     | .....  | [900] |
| EU-3        | .....                   | .....                               | .....                          | .....          | .....  | T.....             | .....  | .....  | .....     | .....  | [900] |
| EU-1        | .....                   | .....                               | .....                          | .....          | .....  | T.....             | .....  | .....  | .....     | .....  | [900] |
| S.latifolia | .....                   | .....                               | .....                          | .....          | .....  | T..G.....          | .....  | .....  | .....     | .....  | [900] |
| Stellaria   | .....                   | .....                               | .....                          | .....          | .....  | T.....             | .....  | .....  | .....     | .....  | [900] |
| Dianthus    | C.....                  | .....                               | T.....                         | .....          | .....  | T.....             | .....  | .....  | .....     | .....  | [900] |
| Beta        | .....                   | .....                               | .....                          | .....          | .....  | T.....             | .....  | A..... | .....     | .....  | [900] |
| Arabidopsis | .....                   | A.....                              | .....                          | .....          | .....  | T.....             | G..... | A..... | A.....    | C..... | [900] |
| Oenothera   | .....                   | .....                               | G..A.....                      | .....          | T..... | GA.....            | G..... | A..... | C.....    | C..... | [900] |
| Pisum       | .....                   | T.....                              | G.....                         | .....          | T..... | C..G.....          | A..... | T..... | C.....    | .....  | [900] |
| Helianthus  | .....                   | A.....                              | G.....                         | .....          | T..... | G.....             | A..... | C..... | .....     | .....  | [900] |
| Nicotiana   | .....                   | A.....                              | G.....                         | C.....         | T..... | .....              | A..... | C..... | .....     | .....  | [900] |
| Solanum     | .....                   | A.....                              | G.....                         | C.....         | T..... | .....              | A..... | C..... | .....     | .....  | [900] |
| Triticum    | .....                   | A.....                              | C.....                         | .....          | T..... | GAA.....           | G..... | A..... | A.....    | C..... | [900] |
| Oryza       | .....                   | A.....                              | C.....                         | .....          | T..... | GAA.....           | G..... | A..... | A.....    | C..... | [900] |
| Zea         | G.....                  | A.....                              | C.....                         | .....          | T..... | GAA.....           | G..... | A..... | A.....    | C..... | [900] |
| Marchantia  | A..G.....               | C.....                              | G..TA.....                     | G.G.CAT.A..... | .....  | CA.T..C.C.TCA..... | .....  | A..... | A..A..... | C..... | [900] |

|             | 910                           | 920                                                                | 930        | 940   | 950    | 960       | 970    | 980    | 990        | 1000   |        |
|-------------|-------------------------------|--------------------------------------------------------------------|------------|-------|--------|-----------|--------|--------|------------|--------|--------|
| CO-2        | CAAGGAATCTTTGGTTGCTTTTGGCGGAT | IGCTTACTACTAGGTTGGATCGGATGTCAACCTGTGGAAGCACCATTTGTTACTATAGGACAAATT | GCTI       |       |        |           |        |        |            |        | [1000] |
| AK-1        | .....                         | .....                                                              | .....      | ..... | .....  | .....     | .....  | .....  | .....      | .....  | [1000] |
| EU-2        | .....                         | .....                                                              | .....      | ..... | .....  | A.....    | .....  | C..... | T.....     | .....  | [1000] |
| CO-1        | A.....                        | .....                                                              | .....      | ..... | .....  | .....     | .....  | C..... | T.....     | .....  | [1000] |
| AK-3        | .....                         | .....                                                              | .....      | ..... | .....  | .....     | .....  | C..... | T.....     | .....  | [1000] |
| AK-4        | .....                         | .....                                                              | .....      | ..... | .....  | .....     | .....  | .....  | .....      | .....  | [1000] |
| AK-2        | .....                         | .....                                                              | .....      | ..... | .....  | .....     | .....  | G..... | C.....     | T..... | [1000] |
| EU-3        | .....                         | .....                                                              | .....      | ..... | .....  | .....     | .....  | G..... | C.....     | T..... | [1000] |
| EU-1        | .....                         | .....                                                              | .....      | ..... | .....  | .....     | .....  | C..... | T.....     | .....  | [1000] |
| S.latifolia | .....                         | .....                                                              | .....      | ..... | .....  | .....     | .....  | C..... | T.....     | .....  | [1000] |
| Stellaria   | A.....                        | .....                                                              | .....      | ..... | .....  | .....     | .....  | C..... | T.....     | .....  | [1000] |
| Dianthus    | .....                         | .....                                                              | .....      | ..... | .....  | .....     | G..... | G..... | .....      | .....  | [1000] |
| Beta        | C.....                        | .....                                                              | .....      | ..... | .....  | .....     | C..... | T..... | C.....     | .....  | [1000] |
| Arabidopsis | G.....                        | .....                                                              | .....      | ..... | .....  | G..T..... | .....  | T..... | T..C.....  | .....  | [1000] |
| Oenothera   | A.....                        | .....                                                              | .....      | ..... | .....  | G.....    | .....  | T..... | T..C.....  | .....  | [1000] |
| Pisum       | A.....                        | .....                                                              | C.....     | ..... | .....  | G.....    | .....  | T..... | C..C.....  | .....  | [1000] |
| Helianthus  | A.....                        | .....                                                              | .....      | ..... | .....  | G.....    | G..... | T..... | CT..C..... | .....  | [1000] |
| Nicotiana   | A.....                        | .....                                                              | .....      | ..... | .....  | G.....    | C..... | T..... | T..C.....  | .....  | [1000] |
| Solanum     | A.....                        | .....                                                              | .....      | ..... | .....  | G.....    | C..... | T..... | T..C.....  | .....  | [1000] |
| Triticum    | A.....                        | .....                                                              | .....      | ..... | .....  | G.....    | .....  | T..... | T..C.....  | .....  | [1000] |
| Oryza       | A.....                        | .....                                                              | .....      | ..... | .....  | G.....    | .....  | T..... | C.....     | .....  | [1000] |
| Zea         | A.....                        | .....                                                              | .....      | ..... | .....  | G.....    | .....  | T..... | T.....     | .....  | [1000] |
| Marchantia  | AA.T.T.....                   | G.A..A.....                                                        | G..TT..... | ..... | T..... | .....     | C..... | A..... | T.....     | .....  | [1000] |

|             | 1010                                    | 1020 | 1030 | 1040 |        |
|-------------|-----------------------------------------|------|------|------|--------|
| CO-2        | CTTTAGTTTTCTTCTTGTTCTTTGCCATAACGCCCATTC |      |      |      | [1041] |
| AK-1        | .....                                   |      |      |      | [1041] |
| EU-2        | .....                                   |      |      |      | [1041] |
| CO-1        | ...T.....                               |      |      |      | [1041] |
| AK-3        | .....                                   |      |      |      | [1041] |
| AK-4        | .G.....GG...A..                         |      |      |      | [1041] |
| AK-2        | .....                                   |      |      |      | [1041] |
| EU-3        | .....                                   |      |      |      | [1041] |
| EU-1        | .....                                   |      |      |      | [1041] |
| S.latifolia | .....                                   |      |      |      | [1041] |
| Stellaria   | ...T.....                               |      |      |      | [1041] |
| Dianthus    | .....                                   |      |      |      | [1041] |
| Beta        | ...TC.....                              |      |      |      | [1041] |
| Arabidopsis | ...G.....                               |      |      |      | [1041] |
| Oenothera   | ..A.....                                |      |      |      | [1041] |
| Pisum       | ...T..G.....C.                          |      |      |      | [1041] |
| Helianthus  | ...C.....                               |      |      |      | [1041] |
| Nicotiana   | .....                                   |      |      |      | [1041] |
| Solanum     | .....                                   |      |      |      | [1041] |
| Triticum    | ..G.CT.....C.                           |      |      |      | [1041] |
| Oryza       | ...CT.....C.                            |      |      |      | [1041] |
| Zea         | ...CT.....C.                            |      |      |      | [1041] |
| Marchantia  | .AG.G.G...T....C.AT....T.....T          |      |      |      | [1041] |
